# Supplementary material for: Composition and genetics of malaria vector populations in the Central African Republic
Source: PubMed Central journal article supplement (PMC4960874; doi:10.1186/s12936-016-1431-2), 2016-07-26

# Additional File 1: Predominant anopheline species captured in 15 districts of Bangui by Human Landing Catch (September-October 2013)

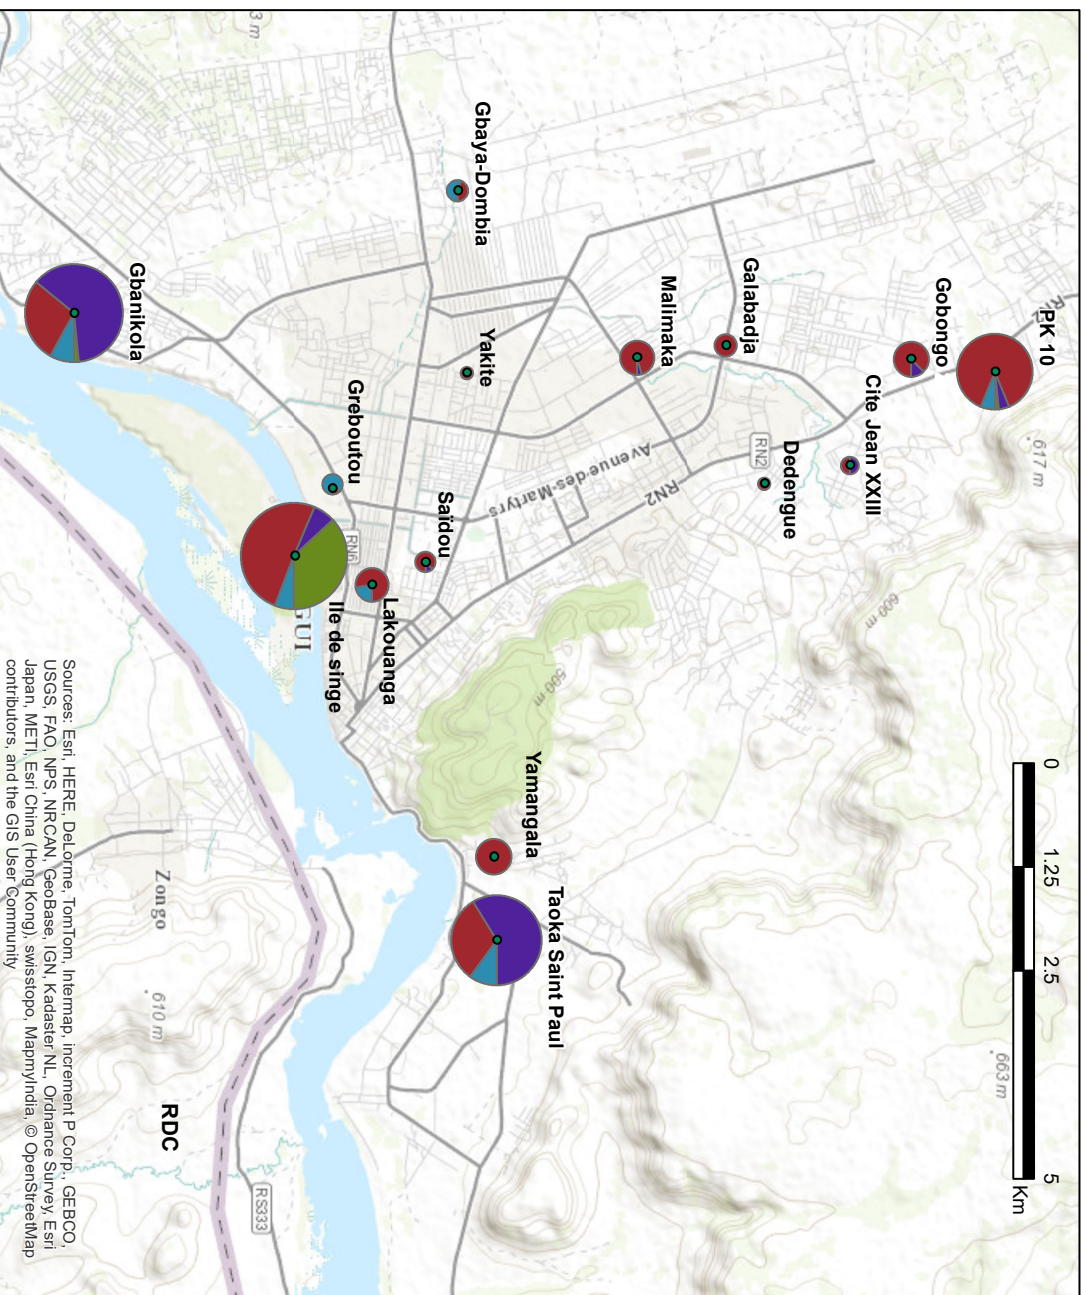

Sources: Esri, HERE, DeLorme, TomTom, Intermap, increment P Corp., GEBCO, USGS, FAO, NPS, NRCAN, GeoBase, IGN, Kadaster NL, Ordnance Survey, Esri, Japan, METI, Esri China (Hong Kong), swisstopo, MapmyIndia, © OpenStreetMap contributors, and the GIS User Community

- An. coustani*
- An. funestus*
- An. gambiae* sister taxa
- An. natalensis*

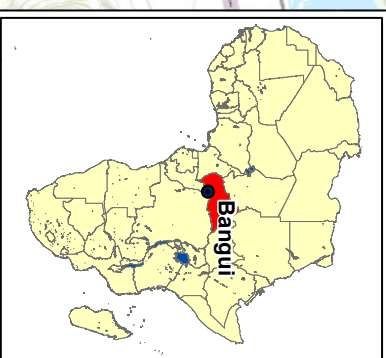

Supplement: 12936_2016_1431_MOESM1_ESM.pdf [file 12936_2016_1431_MOESM1_ESM.pdf]
