# Supplementary material for: Composition and genetics of malaria vector populations in the Central African Republic
Source: PubMed Central journal article supplement (PMC4960874; doi:10.1186/s12936-016-1431-2), 2016-07-26
Supplement: 12936_2016_1431_MOESM4_ESM.pdf [file 12936_2016_1431_MOESM4_ESM.pdf]

|                                | Human Landing Catch |            | Number of tested mosquitoes |            | Number of positive mosquitoes by CSP-ELISA |           | Circumsporozoite rate (%) |              |
|--------------------------------|---------------------|------------|-----------------------------|------------|--------------------------------------------|-----------|---------------------------|--------------|
|                                | Indoor              | Outdoor    | Indoor                      | Outdoor    | Indoor                                     | Outdoor   | Indoor                    | Outdoor      |
| <i>An. gambiae</i> sister taxa | 233                 | 197        | 233                         | 197        | 24                                         | 8         | 10.3%                     | 4.06%        |
| <i>An. funestus</i>            | 163                 | 77         | 163                         | 77         | 6                                          | 2         | 3.68%                     | 2.59%        |
| <i>An. coustani</i>            | 7                   | 80         | 7                           | 80         | 0                                          | 2         | 0                         | 2.5%         |
| <i>An. natalensis</i>          | 13                  | 55         | 13                          | 55         | 0                                          | 0         | 0                         | 0            |
| <b>Total</b>                   | <b>416</b>          | <b>409</b> | <b>416</b>                  | <b>409</b> | <b>30</b>                                  | <b>12</b> | <b>7.21%</b>              | <b>2.93%</b> |

**Additional File 4:** All *Anopheles* mosquitoes collected indoors and outdoors by Human Landing Catch in 15 districts of Bangui (September-November 2013) were tested by ELISA-CSP to determine their *Plasmodium* infection status and to calculate their circumsporozoite rates.
