# Supplementary material for: Composition and genetics of malaria vector populations in the Central African Republic
Source: Springer Nature journal article supplement (doi:10.1186/s12936-016-1431-2), 2016-07-25
Supplement: MOESM2 [file 10521136]

| Sites           | <i>An. gambiae</i> sister taxa |         | <i>An. funestus</i> |         | <i>An. coustani</i> |         | <i>An. natalensis</i> |         |
|-----------------|--------------------------------|---------|---------------------|---------|---------------------|---------|-----------------------|---------|
|                 | Indoor                         | Outdoor | Indoor              | Outdoor | Indoor              | Outdoor | Indoor                | Outdoor |
| Cite Jean XXIII | 2                              | 1       | 1                   | 2       | 0                   | 0       | 0                     | 0       |
| Dedengue        | 3                              | 0       | 0                   | 0       | 0                   | 0       | 0                     | 0       |
| Galabadja       | 4                              | 6       | 0                   | 0       | 0                   | 0       | 0                     | 0       |
| Gbanikola       | 29                             | 24      | 86                  | 32      | 0                   | 3       | 2                     | 13      |
| Gbaya-Dombia    | 1                              | 3       | 0                   | 0       | 0                   | 0       | 0                     | 5       |
| Gobongo         | 7                              | 14      | 0                   | 3       | 0                   | 0       | 0                     | 0       |
| Greboutou       | 1                              | 0       | 0                   | 0       | 0                   | 0       | 1                     | 6       |
| Ile de singe    | 78                             | 34      | 10                  | 5       | 6                   | 76      | 4                     | 9       |
| Lakouanga       | 9                              | 8       | 0                   | 0       | 0                   | 0       | 1                     | 4       |
| Malimaka        | 7                              | 15      | 0                   | 1       | 0                   | 0       | 0                     | 0       |
| PK 10           | 54                             | 45      | 4                   | 1       | 1                   | 1       | 3                     | 4       |
| Saïdou          | 1                              | 6       | 0                   | 1       | 0                   | 0       | 0                     | 0       |
| Taoka St Paul   | 23                             | 27      | 62                  | 32      | 0                   | 0       | 2                     | 14      |
| Yakite          | 0                              | 3       | 0                   | 0       | 0                   | 0       | 0                     | 0       |
| Yamangala       | 14                             | 11      | 0                   | 0       | 0                   | 0       | 0                     | 0       |
| Total           | 233                            | 197     | 163                 | 77      | 7                   | 80      | 13                    | 55      |
|                 | 430                            |         | 240                 |         | 87                  |         | 68                    |         |

**Additional File 2:** Number of *Anopheles* collected by Human Landing Catch in 15 districts of Bangui (September-October 2013).
