# Supplementary material for: Composition and genetics of malaria vector populations in the Central African Republic
Source: Springer Nature journal article supplement (doi:10.1186/s12936-016-1431-2), 2016-07-25
Supplement: MOESM3 [file 10521136]

| Sites                        | Number of collected mosquitoes (n=229) |                     | Number of blood-fed mosquitoes (n=193) |                     | Number of mosquitoes tested for blood meal origin (n=170) |                     | Blood meal source in <i>An. gambiae</i> sister taxa (n=149) |           |          | Blood meal source in <i>An. funestus</i> (n=21) |              |          |  |
|------------------------------|----------------------------------------|---------------------|----------------------------------------|---------------------|-----------------------------------------------------------|---------------------|-------------------------------------------------------------|-----------|----------|-------------------------------------------------|--------------|----------|--|
|                              | <i>An. gambiae</i> sister taxa         | <i>An. funestus</i> | <i>An. gambiae</i> sister taxa         | <i>An. funestus</i> | <i>An. gambiae</i> sister taxa                            | <i>An. funestus</i> | Human                                                       | Animal    | Mixture  | Human                                           | Animal       | Mixture  |  |
| Cite Jean XXIII              | 12                                     | 0                   | 11                                     | 0                   | 10                                                        | 0                   | 7                                                           | 3         | 0        | 0                                               | 0            | 0        |  |
| Dedengue                     | 14                                     | 2                   | 12                                     | 1                   | 10                                                        | 1                   | 7                                                           | 2         | 1        | 0                                               | 1            | 0        |  |
| Galabadja                    | 13                                     | 2                   | 11                                     | 1                   | 10                                                        | 1                   | 9                                                           | 0         | 1        | 0                                               | 1            | 0        |  |
| Gbanikola                    | 15                                     | 6                   | 12                                     | 4                   | 10                                                        | 4                   | 10                                                          | 0         | 0        | 3                                               | 1            | 0        |  |
| Gbaya-dombia                 | 12                                     | 3                   | 11                                     | 2                   | 10                                                        | 2                   | 7                                                           | 3         | 0        | 1                                               | 1            | 0        |  |
| Gobongo                      | 13                                     | 2                   | 11                                     | 1                   | 10                                                        | 1                   | 9                                                           | 1         | 0        | 0                                               | 1            | 0        |  |
| Greboutou                    | 13                                     | 3                   | 12                                     | 2                   | 10                                                        | 2                   | 8                                                           | 1         | 1        | 2                                               | 0            | 0        |  |
| Ile de singe                 | 13                                     | 4                   | 12                                     | 2                   | 10                                                        | 2                   | 9                                                           | 1         | 0        | 1                                               | 1            | 0        |  |
| Lakouanga                    | 13                                     | 1                   | 11                                     | 0                   | 10                                                        | 0                   | 7                                                           | 2         | 1        | 0                                               | 0            | 0        |  |
| Malimaka                     | 12                                     | 2                   | 11                                     | 1                   | 10                                                        | 1                   | 10                                                          | 0         | 0        | 1                                               | 0            | 0        |  |
| PK 10                        | 14                                     | 4                   | 12                                     | 3                   | 10                                                        | 3                   | 8                                                           | 2         | 0        | 1                                               | 2            | 0        |  |
| Saïdou                       | 12                                     | 2                   | 12                                     | 1                   | 10                                                        | 1                   | 9                                                           | 1         | 0        | 0                                               | 1            | 0        |  |
| Taoka St Paul                | 14                                     | 4                   | 12                                     | 2                   | 10                                                        | 2                   | 9                                                           | 1         | 0        | 2                                               | 0            | 0        |  |
| Yakite                       | 11                                     | 1                   | 11                                     | 1                   | 10                                                        | 1                   | 7                                                           | 2         | 1        | 0                                               | 1            | 0        |  |
| Yamangala                    | 10                                     | 2                   | 9                                      | 2                   | 9                                                         | 0                   | 6                                                           | 2         | 1        | 0                                               | 0            | 0        |  |
| <b>Total</b>                 | <b>191</b>                             | <b>38</b>           | <b>170</b>                             | <b>23</b>           | <b>149</b>                                                | <b>21</b>           | <b>122</b>                                                  | <b>21</b> | <b>6</b> | <b>11</b>                                       | <b>10</b>    | <b>0</b> |  |
| <b>Human blood index (%)</b> |                                        |                     |                                        |                     |                                                           |                     | <b>81.8%</b>                                                |           |          |                                                 | <b>52.3%</b> |          |  |

**Additional File 3:** Anophelines collected by Pyrethrum Spray Catch (PSC) in 15 districts of Bangui (September-November 2013). Blood-fed females were identified and blood meal origin was determined by enzyme-linked immunosorbent assay (ELISA).
